# Supplementary material for: Chimeric tRNAs as tools to induce proteome damage and identify components of stress responses
Source: PubMed Central journal article supplement — Nucleic Acids Res. 2009 Dec 8;38(5):e30. doi: 10.1093/nar/gkp1083 (PMC2836549; doi:10.1093/nar/gkp1083), 2009-12-08
Supplement: gkp1083_1.pdf [file gkp1083_1.pdf]

Geslain\_Supplementary Figure 1

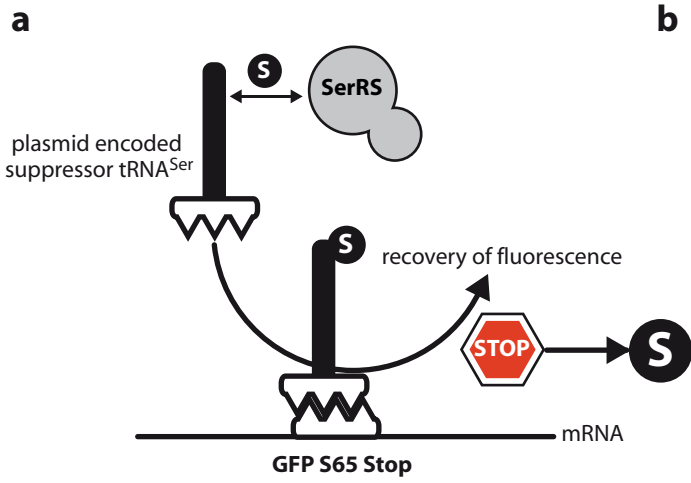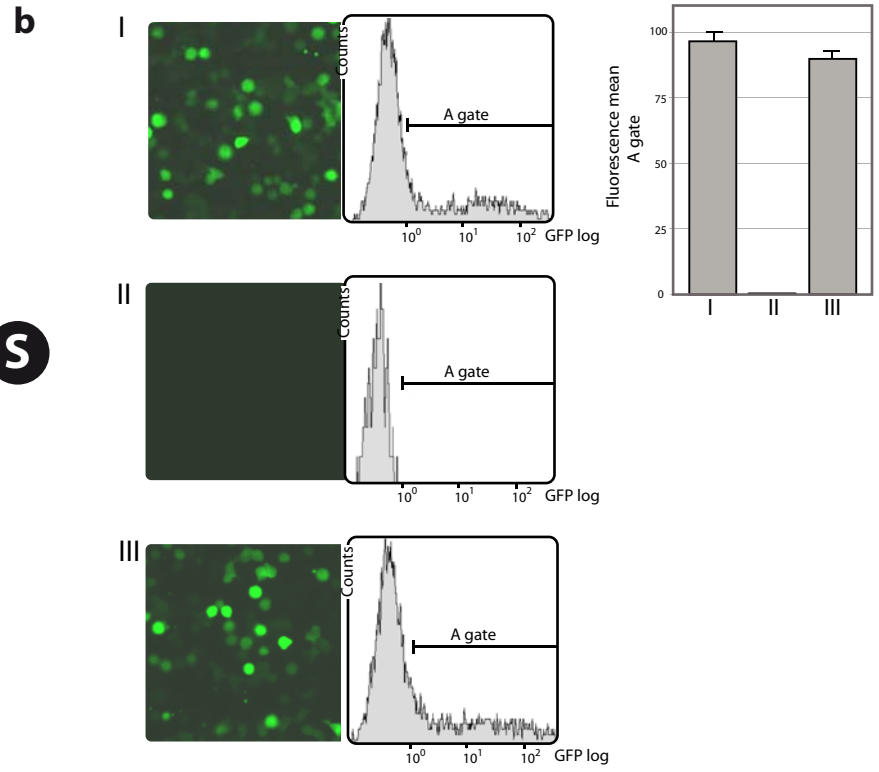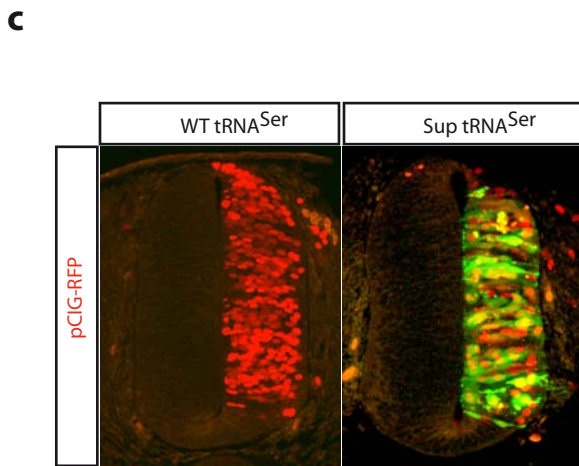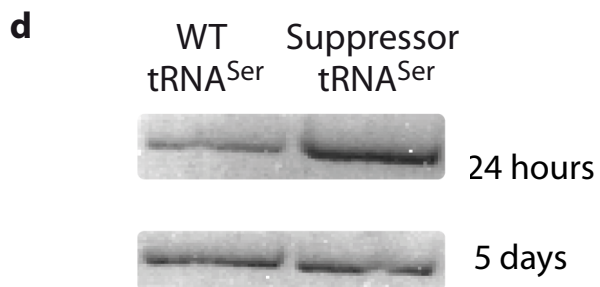

Geslain\_Supplementary Figure 2

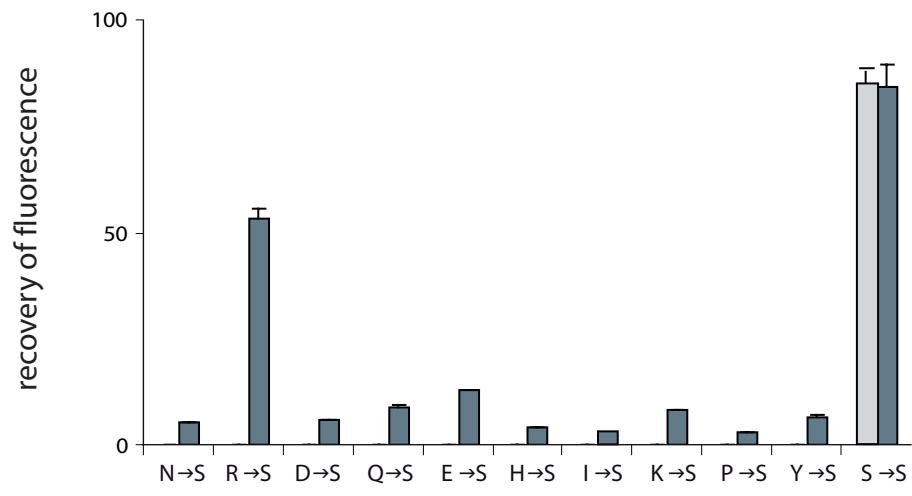

# Geslain\_Supplementary Figure 3

a

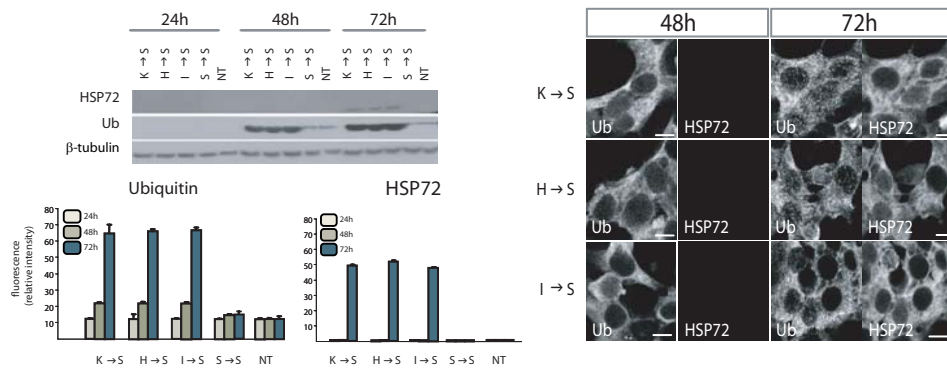

b

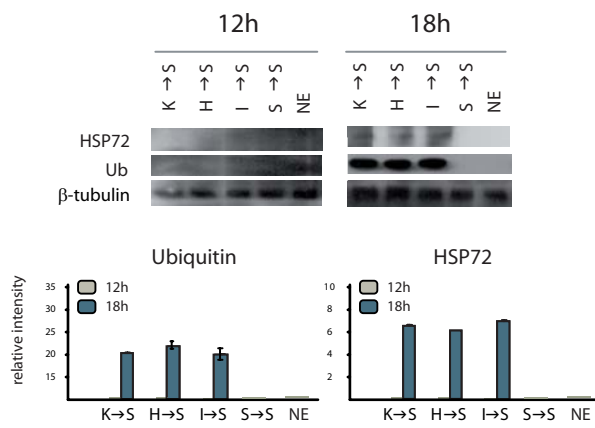

Supplementary Table 1

| mutation | codon recognized | chimeric tRNA                            |
|----------|------------------|------------------------------------------|
| A - S    | GCA              | tRNA <sup>Ser</sup> <sub>UGC</sub> (Ala) |
| C - S    | TGT              | tRNA <sup>Ser</sup> <sub>ACA</sub> (Cys) |
| D - S    | GAC              | tRNA <sup>Ser</sup> <sub>GUC</sub> (Asp) |
| E - S    | GAG              | tRNA <sup>Ser</sup> <sub>CUC</sub> (Glu) |
| F - S    | TTT              | tRNA <sup>Ser</sup> <sub>AAA</sub> (Phe) |
| G - S    | GGA              | tRNA <sup>Ser</sup> <sub>UCC</sub> (Gly) |
| H - S    | CAT              | tRNA <sup>Ser</sup> <sub>AUG</sub> (His) |
| I - S    | ATT              | tRNA <sup>Ser</sup> <sub>AAU</sub> (Ile) |
| K - S    | AAG              | tRNA <sup>Ser</sup> <sub>CUU</sub> (Lys) |
| L - S    | TTG              | tRNA <sup>Ser</sup> <sub>CAA</sub> (Leu) |
| N - S    | AAC              | tRNA <sup>Ser</sup> <sub>GUU</sub> (Asn) |
| P - S    | CCT              | tRNA <sup>Ser</sup> <sub>AGG</sub> (Pro) |
| Q - S    | GAG              | tRNA <sup>Ser</sup> <sub>CUC</sub> (Gln) |
| R - S    | CGA              | tRNA <sup>Ser</sup> <sub>UCG</sub> (Arg) |
| T - S    | ACT              | tRNA <sup>Ser</sup> <sub>AGU</sub> (Thr) |
| V - S    | GTT              | tRNA <sup>Ser</sup> <sub>AAC</sub> (Val) |
| Y - S    | TAT              | tRNA <sup>Ser</sup> <sub>AUA</sub> (Tyr) |

Supplementary Table 2

|                     | <b>overall percentatge<br/>of substitutions</b> | <b>Ile<br/>frequency</b> |
|---------------------|-------------------------------------------------|--------------------------|
| <b>ER</b>           | <b>59.7 %</b>                                   | <b>6.3%</b>              |
| <b>NUCLEUS</b>      | <b>61.7%</b>                                    | <b>5.9%</b>              |
| <b>MITOCHONDRIA</b> | <b>58.4%</b>                                    | <b>6.6%</b>              |
| <b>CYTOPLASM</b>    | <b>61.1%</b>                                    | <b>6.2%</b>              |
